# Supplementary material for: Childhood adversity and asthma prevalence: evidence from 10 US states (2009–2011)
Source: PubMed Central journal article supplement — BMJ Open Respir Res. 2014 Mar 20;1(1):e000016. doi: 10.1136/bmjresp-2013-000016 (PMC4212798; doi:10.1136/bmjresp-2013-000016), 2014-03-20
Supplement: bmjresp-2013-000016-s1.pdf [file bmjresp-2013-000016-s1.pdf]

**Supplementary Table 1: Distribution of ACE Dimensions in the Sample and Co-occurrence of ACE by Gender and Asthma Prevalence**

| Total n=84,786              | Sample (%) | Men (%) | Women (%) | Asthma Prevalence |
|-----------------------------|------------|---------|-----------|-------------------|
| <i>No adversity</i>         | 41.52      | 42.02   | 40.94     | 10.12             |
| <b>Category 1 adversity</b> | 23.20      | 25.33   | 21.78     | 12.57             |
| <b>Category 2 adversity</b> | 9.78       | 9.94    | 9.76      | 15.42             |
| <b>Category 3 adversity</b> | 13.89      | 16.2    | 12.44     | 15.62             |
| <b>Category 4 adversity</b> | 11.61      | 6.5     | 15.08     | 20.60             |

**Category 1:** Parental Marital Discord + Experience of a verbal Abuse; **Category 2:** Parental Marital Discord + Experience of a verbal Abuse + Stressful Living Conditions; **Category 3:** Parental Marital Discord + Experience of a verbal Abuse + Stressful Living Conditions + Experience of Physical Abuse; **Category 4:** Parental Marital Discord + Experience of a verbal Abuse + Stressful Living Conditions + Experience of Physical Abuse + Sexual Abuse.

**Supplementary Table 2: Questions on ACE from the BRFSS Questionnaires (2009-2011)**

I'd like to ask you some questions about events that happened during your childhood. This information will allow us to better understand problems that may occur early in life, and may help others in the future. This is a sensitive topic and some people may feel uncomfortable with these questions. At the end of this section, I will give you a phone number for an organization that can provide information and referral for these issues. Please keep in mind that you can ask me to skip any question you do not want to answer.

All questions refer to the time period before you were 18 years of age. Now, looking back before you were 18 years of age—

| <b>Dimension</b>                    | <b>Questions in the BRFSS</b>                                                                                                                                                                                                                                                                                                                                              |
|-------------------------------------|----------------------------------------------------------------------------------------------------------------------------------------------------------------------------------------------------------------------------------------------------------------------------------------------------------------------------------------------------------------------------|
| <i>Parental Marital Discord</i>     | Were your parents separated or divorced?                                                                                                                                                                                                                                                                                                                                   |
| <i>Stressful Living Conditions</i>  | Did you live with anyone who was depressed, mentally ill, or suicidal?<br>Did you live with anyone who was a problem drinker or alcoholic?<br>Did you live with anyone who used illegal street drugs or who abused prescription medications?<br>Did you live with anyone who served time or was sentenced to serve time in a prison, jail, or other correctional facility? |
| <i>Experience of verbal abuse</i>   | How often did a parent or adult in your home ever swear at you, insult you, or put you down?                                                                                                                                                                                                                                                                               |
| <i>Experience of physical abuse</i> | How often did your parents or adults in your home ever slap, hit, kick, punch or beat each other up?<br>Before age 18, how often did a parent or adult in your home ever hit, beat, kick, or physically hurt you in any way? Do not include spanking.                                                                                                                      |
| <i>Experience of sexual abuse</i>   | How often did anyone at least 5 years older than you or an adult, ever touch you sexually?<br>How often did anyone at least 5 years older than you or an adult, try to make you touch them sexually?<br>How often did anyone at least 5 years older than you or an adult, force you to have sex?                                                                           |

As I mentioned when we started this section, I will give you a phone number for an organization that can provide information and referral for these issues. Would you like me to give you that number? NOTE: If no local or state hotline is available, the National Hotline for child abuse is XXX

**Supplementary Table 3: Co-occurrence of ACE Dimensions (Numbers and proportion (%) of sample)**

|                                           | <i>ACE Exposure by itself</i> | <i>Parental Marital Discord</i> | <i>Stressful Living Conditions</i> | <i>Verbal Abuse</i> | <i>Physical Abuse</i> | <i>Sexual Abuse</i> |
|-------------------------------------------|-------------------------------|---------------------------------|------------------------------------|---------------------|-----------------------|---------------------|
| <b><i>Parental Marital Discord</i></b>    | 15,073<br>(18.1)              | ***                             | 7,833<br>(9.4)                     | 6560<br>(7.87)      | 5339<br>(6.4)         | 1655<br>(1.98)      |
| <b><i>Stressful Living Conditions</i></b> | 26,587<br>(31.93)             | ***                             | ***                                | 13,614<br>(16.35)   | 10,475<br>(12.58)     | 4,417<br>(5.3)      |
| <b><i>Verbal Abuse</i></b>                | 24,673<br>(29.63)             | ***                             | ***                                | ***                 | 11,221<br>(13.47)     | 4,153<br>(4.99)     |
| <b><i>Physical Abuse</i></b>              | 16,795<br>(20.17)             | ***                             | ***                                | ***                 | ***                   | 3,168<br>(3.8)      |
| <b><i>Sexual Abuse</i></b>                | 8141<br>(9.77)                | ***                             | ***                                | ***                 | ***                   | ***                 |

**Supplementary Table 4: Current Asthma and ACE, adjusted for Smoking**

|                      | <b>Model 4<br/>(Fully Adjusted)</b> | <b>Model 5<br/>(Model 4 &amp; adjusted for smoking)</b> |
|----------------------|-------------------------------------|---------------------------------------------------------|
| <b>ACE (None)</b>    | 1.00                                | 1.00                                                    |
| <b>Category 1</b>    | 1.24 (1.17,1.31)                    | 1.22 (1.15,1.29)                                        |
| <b>Category 2</b>    | 1.47 (1.37,1.59)                    | 1.44 (1.34,1.55)                                        |
| <b>Category 3</b>    | 1.54 (1.44,1.64)                    | 1.49 (1.40,1.59)                                        |
| <b>Category 4</b>    | 1.88 (1.77,2.006)                   | 1.82 (1.71,1.94)                                        |
| <b>Smoking (Yes)</b> |                                     | 1.18 (1.12,1.23)                                        |
